# Supplementary material for: Air Quality Measurements in Kitchener, Ontario, Canada Using Multisensor Mini Monitoring Stations
Source: MDPI journal article supplement (doi:10.3390/atmos13010083), 2022-01-05
Supplement: s1 [file s1]

Archive with 1 entries (1 files):
- atmosphere-1509490 sp revised.pdf
